# Supplementary material for: Generation of an artificial human B cell line test system using Transpo-mAbTM technology to evaluate the therapeutic efficacy of novel antigen-specific fusion proteins
Source: PLoS One. 2017 Jul 13;12(7):e0180305. doi: 10.1371/journal.pone.0180305 (PMC5509223; doi:10.1371/journal.pone.0180305)
Supplement: S1 Table — (XLSX) [file pone.0180305.s002.xlsx]

## Sheet: Tabelle1
Granzyme B Sustrate Assay
min	GrB(R201K)-TTC		GrB(R201K)-MOCK		EGrB(R201K)-TTC
0	0.234	0.25	0.216	0.218	0.199	0.233
2	0.247	0.265	0.219	0.222	0.199	0.233
4	0.26	0.279	0.223	0.226	0.199	0.233
6	0.271	0.291	0.227	0.23	0.199	0.234
8	0.281	0.302	0.231	0.234	0.2	0.234
10	0.29	0.312	0.235	0.238	0.2	0.235
12	0.298	0.321	0.238	0.242	0.201	0.235
14	0.305	0.329	0.242	0.245	0.201	0.236
16	0.312	0.337	0.246	0.249	0.201	0.236
18	0.318	0.344	0.249	0.253	0.202	0.237
20	0.324	0.35	0.253	0.257	0.202	0.237
22	0.329	0.356	0.256	0.26	0.203	0.238
24	0.333	0.362	0.26	0.264	0.203	0.238
26	0.337	0.366	0.263	0.268	0.203	0.238
28	0.341	0.371	0.267	0.271	0.204	0.239
30	0.344	0.375	0.27	0.275	0.204	0.239
32	0.348	0.379	0.273	0.278	0.205	0.24
34	0.35	0.382	0.276	0.281	0.205	0.24
36	0.353	0.385	0.279	0.284	0.205	0.241
38	0.355	0.388	0.282	0.287	0.206	0.241
40	0.357	0.391	0.285	0.29	0.206	0.242
42	0.359	0.394	0.288	0.294	0.207	0.242
44	0.361	0.396	0.291	0.296	0.207	0.242
46	0.363	0.398	0.293	0.299	0.208	0.243
48	0.364	0.4	0.296	0.302	0.208	0.243
50	0.366	0.402	0.299	0.305	0.208	0.244
52	0.367	0.404	0.301	0.307	0.209	0.244
54	0.368	0.405	0.304	0.31	0.209	0.245
56	0.369	0.407	0.306	0.312	0.209	0.245
58	0.37	0.408	0.308	0.315	0.21	0.245
60	0.371	0.409	0.31	0.317	0.21	0.246
